# Supplementary material for: Differential association of seven adiposity parameters with cognitive impairment in the elderly
Source: Research Square preprint supplement (doi:10.21203/rs.3.rs-5430340/v1), 2024-12-12
Supplement: Supplementary file 1 [file 27b20a0d77255338bda46ac3.docx]

|  | BMI | WC | AC | WHtR | BRI | WWI | ABSI |
| --- | --- | --- | --- | --- | --- | --- | --- |
| BMI | 1 |  |  |  |  |  |  |
| WC | 0.366* | 1 |  |  |  |  |  |
| AC | 0.668* | 0.261* | 1 |  |  |  |  |
| WHtR | 0.013* | 0.005* | 0.014* | 1 |  |  |  |
| BRI | 0.312* | 0.127* | 0.328* | 0.041* | 1 |  |  |
| WWI | 0.043* | 0.027* | 0.030* | 0.089* | 0.237* | 1 |  |
| ABSI | -0.132* | 0.078* | -0.172* | 0.003* | 0.072* | 0.108* | 1 |

Table 3. Correlations between various obesity parameters

The result is expressed by Pearson correlation coefficient

*BMI* body mass index, *WC* waist circumference, *AC* arm circumference, *WHtR* waist-to-height ratio, *BRI* body roundness index, *WWI* weight-adjusted-waist index, *ABSI* a body shape index.

*P＜0.05
