# Supplementary material for: Differential association of seven adiposity parameters with cognitive impairment in the elderly
Source: Research Square preprint supplement (doi:10.21203/rs.3.rs-5430340/v1), 2024-12-12
Supplement: Supplementary file 2 [file 7252231f4add3dcc3e6652ff.docx]

| Adiposity parameters | AUC (95% CI) | Cutpoint | Sensitivity | Specificity |
| --- | --- | --- | --- | --- |
| BMI | 0.474 | 27.9 | 48.76% | 47.92% |
| AC | 0.460 | 32.2 | 46.01% | 48.97% |
| WC | 0.502 | 101.0 | 50.96% | 50.39% |
| WHtR | 0.514 | 0.61 | 50.96% | 50.21% |
| BRI | 0.513 | 5.63 | 50.96% | 50.16% |
| WWI | 0.575 | 11.6 | 53.86% | 56.16% |
| ABSI | 0.591 | 85.3 | 53.86% | 59.55% |

Table 4. AUC values for adiposity parameters in relation to cognitive impairment

*AUC* area under the receiver operating characteristic curve, *BMI* body mass index, *WC* waist circumference, *AC* arm circumference, *WHtR* waist-to-height ratio, *BRI* body roundness index, *WWI* weight-adjusted-waist index, *ABSI* a body shape index.
