# Supplementary material for: Differential association of seven adiposity parameters with cognitive impairment in the elderly
Source: Research Square preprint supplement (doi:10.21203/rs.3.rs-5430340/v1), 2024-12-12
Supplement: Supplementary file 3 [file b4b2d36cad6d736edc03c982.docx]

| Characteristic | Total  (N = 2,909) | Male  (N = 1,420) | Female  (N = 1,489) | P  value |
| --- | --- | --- | --- | --- |
| Age (years) | 68 (63, 75) | 68 (63, 75) | 68 (63, 75) | 0.672 |
| BMI (kg/m2) | 28.0 (24.7, 32.2) | 27.6 (24.8, 31.2) | 28.6 (24.5, 33.3) | < 0.001 |
| Ethnicity, n (%) |  |  |  | 0.080 |
| Mexican American | 107 (3.68%) | 55 (3.92%) | 52 (3.48%) |  |
| Other Hispanic | 111 (3.83%) | 51 (3.49%) | 60 (4.12%) |  |
| Non-Hispanic White | 2,284 (78.50%) | 1,125 (79.27%) | 1,159 (77.86%) |  |
| Non-Hispanic Black | 251 (8.63%) | 113 (7.99%) | 138 (9.17%) |  |
| Other race | 156 (5.35%) | 76 (5.33%) | 80 (5.37%) |  |
| Education level, n (%) |  |  |  | < 0.001 |
| ≤ High school | 1,111 (38.19%) | 509 (35.82%) | 602 (40.18%) |  |
| College | 919 (31.58%) | 399 (28.13%) | 520 (34.48%) |  |
| > College | 879 (30.23%) | 512 (36.05%) | 367 (25.34%) |  |
| Smoking, n (%) |  |  |  | < 0.001 |
| Current | 323 (11.11%) | 181 (12.73%) | 142 (9.74%) |  |
| Former | 1,152 (39.6%) | 693 (48.82%) | 459 (31.82%) |  |
| Never | 1,434 (49.29%) | 546 (38.45%) | 888 (58.43%) |  |
| Drinking, n (%) |  |  |  | 0.008 |
| Never | 777 (26.72%) | 374 (26.38%) | 403 (27.04%) |  |
| Mild | 1,591 (54.69%) | 724 (50.94%) | 867 (58.30%) |  |
| Moderate or Heavy | 541 (18.59%) | 322 (22.69%) | 219 (14.65%) |  |
| Diabetes mellitus, n (%) | | | | 0.044 |
| Yes | 775 (26.65%) | 399 (28.12%) | 378 (25.41%) |  |
| No | 2,134 (73.35%) | 1,021 (71.88%) | 1,111 (74.59%) |  |
| Hypertension, n (%) |  |  |  | 0.016 |
| Yes | 1,940 (66.70%) | 924 (65.08%) | 1,016 (68.06%) |  |
| No | 969 (33.3%) | 496 (34.92%) | 473 (31.94%) |  |
| Hyperlipidaemia, n (%) |  |  |  | 0.667 |
| Yes | 1,852 (63.66%) | 925 (65.16%) | 927 (62.4%) |  |
| No | 1,057 (36.34%) | 495 (34.84%) | 562 (37.6%) |  |
| Laboratory measurements | | | | |
| FBG (mg/dL) | 105 (97, 121) | 108 (99, 126) | 103 (96, 116) | < 0.001 |
| INS (uU/mL) | 10.13 (6.41, 16.03) | 10.34 (6.40, 16.03) | 10.08 (6.43, 16.04) | 0.182 |
| TG (mg/dL) | 105 (75, 149) | 105 (75, 149) | 106 (75, 149) | 0.147 |
| TC (mg/dL) | 189 (161, 218) | 177 (150, 208) | 200 (173, 228) | < 0.001 |
| HDL-C (mg/dL) | 52 (43, 63) | 46 (39, 56) | 57 (48, 68) | < 0.001 |
| LDL-C (mg/dL) | 108 (84, 131) | 100 (78, 124) | 115 (92, 137) | < 0.001 |

**Table 1.** Characteristics of study participants included in the analyses of the 2011–2014 datasets. *BMI* body mass index, *FBG* fasting blood-glucose, *INS* fasting insulin, *TG* triglyceride, *TC* total cholesterol, *HDL* high-density lipoprotein, *LDL* low density lipoprotein.

Continuous and categorical variables are expressed in medians (25th-75th percentile) and numbers (percentages).* Considering the complex sampling design of NHANES, we used weighting in the data processing.
