# Supplementary material for: Differential association of seven adiposity parameters with cognitive impairment in the elderly
Source: Research Square preprint supplement (doi:10.21203/rs.3.rs-5430340/v1), 2024-12-12
Supplement: Supplementary file 4 [file ea5c0d4f39376d0984b28350.docx]

|  | Total | Quarter 1 | Quarter 2 | Quarter 3 | Quarter 4 |
| --- | --- | --- | --- | --- | --- |
| BMI | 28.00 (24.70, 32.20) | 22.70 (21.20, 23.80) | 26.40 (25.60, 27.20) | 29.90 (28.90, 30.90) | 35.70 (33.70, 39.35) |
| WC | 100.80 (92.00, 110.30) | 85.50 (80.60, 89.00) | 96.60 (94.40, 98.80) | 105.15 (103.00, 107.50) | 118.65 (114.00, 125.58) |
| AC | 32.10 (29.30, 35.20) | 27.40 (25.80, 28.40) | 30.80 (30.10, 31.40) | 33.50 (32.80, 34.40) | 37.80 (36.20, 40.10) |
| WHtR | 0.61 (0.56, 0.67) | 0.52 (0.50, 0.54) | 0.58 (0.57, 0.60) | 0.63 (0.62, 0.65) | 0.72 (0.69, 0.76) |
| BRI | 5.64 (4.49, 7.08) | 3.82 (3.29, 4.18) | 5.06 (4.78, 5.36) | 6.25 (5.90, 6.61) | 8.32 (7.61, 9.56) |
| WWI | 11.50 (11.02, 11.95) | 10.69 (10.41, 10.87) | 11.27 (11.15, 11.39) | 11.70 (11.61, 11.83) | 12.31 (12.13, 12.63) |
| ABSI | 84.56 (81.56, 87.58) | 79.56 (77.64, 80.67) | 83.10 (82.34, 83.78) | 86.02 (85.28, 86.82) | 89.63 (88.46, 91.30) |

Table 2 The characteristic of 7 adiposity parameters as four categorical variables.

Data are expressed in the median (25th-75th percentile).

*BMI* body mass index, *WC* waist circumference, *AC* arm circumference, *WHtR* waist-to-height ratio, *BRI* body roundness index, *WWI* weight-adjusted-waist index, *ABSI* a body shape index.
